# Supplementary material
Source: Springer Nature journal article supplement (https://www.springermedizin.de/resource/supplementary/12874_2012_866_MOESM4_ESM.pdf/9432698)
Supplement: MOESM4 [file 9432698]

Intervention dose

Domains

Intervention delivery

Participation

Decisions

*Quantity*

*Quality*

*Quantity*

*Quality*

Supervisors

Supervisors

Supervisors

Supervisors

**Anchors  
personnel:**

**Anchors  
personnel:**

**Anchors  
personnel:**

**Anchors  
personnel:**

- *Providers:*  
implementing the  
intervention  
- *Receivers:*  
being trained in  
the intervention

- *Providers:*  
implementing the  
intervention  
- *Receivers:* being  
trained in the  
intervention

- *Providers:*  
implementing the  
intervention  
- *Receivers:* being  
trained in the  
intervention

- *Providers:*  
implementing the  
intervention  
- *Receivers:* being  
trained in the  
intervention

Targets

Targets

Targets

Targets

Programme  
Actors
